# Supplementary material for: C-C chemokine receptor 4 deficiency exacerbates early atherosclerosis in mice
Source: eLife. 2025 Jul 3;13:RP101830. doi: 10.7554/eLife.101830 (PMC12226018; doi:10.7554/eLife.101830)
Supplement: Appendix 1—figure 1—source data 1. [file elife-101830-app1-fig1-data1.xlsx]

## Sheet: Appendix 1–figure 1
	Peripheral LNs
	CCR4+ cels
	Peripheral LNs								Spleen
	Wild-type		Apoe-/-		Ccr4-/-Apoe-/-				Wild-type		Apoe-/-		Ccr4-/-Apoe-/-
	Treg	Non-Treg	Treg	Non-Treg	Treg	Non-Treg			Treg	Non-Treg	Treg	Non-Treg	Treg	Non-Treg
	18.5	5.1	16.2	6.16	1.34	1.86			22.1	9.77	23.6	9.8	1.28	2.71
	20.4	5.51	19.7	7.27	1.47	2.86			25.3	5.26	20.9	9.65	1.42	3.16
	18.9	5.44	18.6	7.47	1.93	3.09			24.3	10.7	21.4	10.7	1.12	3.7
	18.9	5.17	21.1	7.8	1.44	2.57			24.2	10.7	22.1	9.71	1.41	4.25
	19	5.84	15.2	5.33	1.82	3.52			22.2	10.7	16.3	5.38	1.62	2.84
	Para-aortic LNs
	Wild-type		Apoe-/-		Ccr4-/-Apoe-/-
	Treg	Non-Treg	Treg	Non-Treg	Treg	Non-Treg
	5.53	4.1	10.5	5.65	2.48	2.93
	11.6	6.59	14.7	6.81	2.12	5.03
	12.8	9.68	15.1	6.68	1.58	4.27
	12.3	7.08	15.7	7.96	1.4	3.39
	18.5	7.07	17.4	10.3	1.97	4.97
