# Supplementary material for: C-C chemokine receptor 4 deficiency exacerbates early atherosclerosis in mice
Source: eLife. 2025 Jul 3;13:RP101830. doi: 10.7554/eLife.101830 (PMC12226018; doi:10.7554/eLife.101830)
Supplement: Figure 2—figure supplement 1—source data 1. [file elife-101830-fig2-figsupp1-data1.xlsx]

## Sheet: Figure 2–figure supplement 1
	Peripheral LNs						Spleen
	Foxp3+/CD4			Cell number			Foxp3+/CD4			Cell number
	Wild-type	Ccr4-/-		Wild-type	Ccr4-/-		Wild-type	Ccr4-/-		Wild-type	Ccr4-/-
	5.67	6.67		3.1766	9.4934		4.95	6.2		4.00497	5.06818
	6.49	6.69		1.8863	14.5123		5.49	5.62		4.547	7.21396
	6.2	7.28		23.4065	11.9821		4.52	7.11		3.16835	7.50079
	5.5	7.46		1.8022	26.2751		4.98	5.65		3.31093	3.98832
	6.75	6.69		4.5716	7.6013		4.81	6.82		3.23649	6.04926
		6.38			9.7636			6.7			3.52458
	Peripheral LNs						Spleen
	CD44+CD62Lhigh/CD4			Cell number			CD44+CD62Lhigh/CD4			Cell number
	Wild-type	Ccr4-/-		Wild-type	Ccr4-/-		Wild-type	Ccr4-/-		Wild-type	Ccr4-/-
	3.12	4.8		1.1938	3.8904		10.3	15.9		6.82861	10.7157
	6.02	5.62		1.1875	9.7359		11.9	28.2		8.17087	22.3795
	4.49	6.35		1.1257	8.8418		10.4	17.8		6.18362	15.245
	5.99	5.47		1.9193	16.0377		11.1	14.8		6.31794	8.33819
	6.42	5.36		3.2367	4.4224		11	15.1		5.87091	11.0138
		5.36			2.6031			15.7			7.32675
