# Supplementary material for: C-C chemokine receptor 4 deficiency exacerbates early atherosclerosis in mice
Source: eLife. 2025 Jul 3;13:RP101830. doi: 10.7554/eLife.101830 (PMC12226018; doi:10.7554/eLife.101830)
Supplement: Figure 2—figure supplement 2—source data 1. [file elife-101830-fig2-figsupp2-data1.xlsx]

## Sheet: Figure 2–figure supplement 2
	Peripheral LNs												Spleen
	CD4+CD8+/Thymocytes			CD4+CD8-/Thymocytes			CD4-CD8+/Thymocytes			Foxp3+/TCRβ+CD4+CD8-
	Apoe-/-	Ccr4-/-Apoe-/-		Apoe-/-	Ccr4-/-Apoe-/-		Apoe-/-	Ccr4-/-Apoe-/-		Apoe-/-	Ccr4-/-Apoe-/-
	83.4	82.5		8.2	8.43		3.81	3.83		3.6	4.88
	85.9	88.8		7.23	5.5		3.17	2.95		4.18	3.86
	81.6	82.6		9.62	9.38		4.58	3.63		4.49	4.95
	77.2	85.8		4.28	4.84		8.1	4.45		6.56	5.41
	85.1	86.1		7.36	6.35		3.45	3.05		4.14	3.93
	81.4	89.9		10	5.19		3.77	2.78		4.27	5.41
