# Supplementary material for: C-C chemokine receptor 4 deficiency exacerbates early atherosclerosis in mice
Source: eLife. 2025 Jul 3;13:RP101830. doi: 10.7554/eLife.101830 (PMC12226018; doi:10.7554/eLife.101830)
Supplement: Figure 2—figure supplement 3—source data 1. [file elife-101830-fig2-figsupp3-data1.xlsx]

## Sheet: Figure 2–figure supplement 3
	CD8+T cell			B220+ B cell			CD11b+Ly6G+ neutrophiles
	Apoe-/-	Ccr4-/-Apoe-/-		Apoe-/-	Ccr4-/-Apoe-/-		Apoe-/-	Ccr4-/-Apoe-/-
	6.33	9.17		56	60.2		0.051	0.052
	5.32	9.58		55.6	53.5		0.123	0.053
	6.38	7.01		49.9	52.2		0.089	0.032
	6.42	6.14		50	53.7		0.109	0.03
	5.88	4.35		58	64.9		0.056	0.115
	CD11b+Ly6Chigh monocytes			NK1.1+ NK cells			CD3+NK1.1+ NKT cells
	Apoe-/-	Ccr4-/-Apoe-/-		Apoe-/-	Ccr4-/-Apoe-/-		Apoe-/-	Ccr4-/-Apoe-/-
	0.094	0.183		0.1	0.72		0.29	0.55
	0.089	0.11		0.11	0.77		0.26	0.54
	0.137	0.125		0.12	0.11		0.21	0.34
	0.121	0.081		0.12	0.099		0.27	0.27
	0.093	0.142		0.23	0.072		0.27	0.26
	CD11c+MHC-II+ Dendritic cells			CD80			CD86
	Apoe-/-	Ccr4-/-Apoe-/-		Apoe-/-	Ccr4-/-Apoe-/-		Apoe-/-	Ccr4-/-Apoe-/-
	1.07	0.97		819	824		487	614
	1.04	1.07		698	853		456	677
	1.1	1.03		574	889		378	704
	1.02	0.78		772	780		514	578
	0.94	0.78		787	813		413	628
