# Supplementary material for: C-C chemokine receptor 4 deficiency exacerbates early atherosclerosis in mice
Source: eLife. 2025 Jul 3;13:RP101830. doi: 10.7554/eLife.101830 (PMC12226018; doi:10.7554/eLife.101830)
Supplement: Figure 2—figure supplement 4—source data 1. [file elife-101830-fig2-figsupp4-data1.xlsx]

## Sheet: Figure 2–figure supplement 4
	Relative expression
	Ccr4			Ccr5			Ccr6			Ccr7			Ccr8
	Apoe-/-	Ccr4-/-Apoe-/-		Apoe-/-	Ccr4-/-Apoe-/-		Apoe-/-	Ccr4-/-Apoe-/-		Apoe-/-	Ccr4-/-Apoe-/-		Apoe-/-	Ccr4-/-Apoe-/-
	1.03	0		0.8	0.74		1.15	2.2		0.77	0.77		0.4	1.12
	1.83	0		1.24	1.39		0.67	1.59		1.34	0.81		1.18	1.9
	1.09	0		1.06	1.18		1.33	1.1		0.83	0.58		1	1.35
	0.63	0		0.66	1.61		0.6	1.13		0.67	0.46		0.83	1.87
	0.71	0		1.17	0.86		1.18	1.13		1.1	1.28		1.3	1.13
	0.37	0		1.18	0.79		1.18	1.67		1.22	1.23		1.3	1.31
	1.32	0		1.2	0.65		1.15	0.73		1.07	1.05		1.03	0.84
	1.02	0		0.68	0.68		0.75	1.29		1	1.03		0.97	1.05
	Ccr1			Ccr4			Ccr5			Ccr6
	Apoe-/-	Ccr4-/-Apoe-/-		Apoe-/-	Ccr4-/-Apoe-/-		Apoe-/-	Ccr4-/-Apoe-/-		Apoe-/-	Ccr4-/-Apoe-/-
	1.01	1.17		1.35	0		0.99	0.91		1.96	5.38
	0.52	3.86		0.68	0		0.48	0.85		0.93	12.53
	1.11	1.62		0.98	0		1.22	0.98		1.44	4.92
	0.73	1.18		0.66	0		0.81	1		0.52	4.09
	0.86	3.91		0.86	0		0.84	0.83		0.58	1.55
	1.65	1.78		0.78	0		1.33	0.67		0.97	1.01
	0.85	1.4		1.46	0		1.24	0.76		0.83	1.15
	1.28	1.5		1.24	0		1.08	0.86		0.77	1.96
	Ccr7			Ccr8			Cxcr3			Cx3cr1
	Apoe-/-	Ccr4-/-Apoe-/-		Apoe-/-	Ccr4-/-Apoe-/-		Apoe-/-	Ccr4-/-Apoe-/-		Apoe-/-	Ccr4-/-Apoe-/-
	0.91	0.72		1.11	2.48		1.12	1.28		0.74	1.61
	1.23	0.83		0.36	3.35		0.93	1.74		1.18	3.88
	0.96	0.66		0.49	2.47		0.78	1.06		0.89	2.08
	0.7	0.53		1.09	2.47		1	1.36		0.92	1.5
	1.23	1.36		0.79	1.82		1.06	1.71		0.86	3.36
	0.93	0.9		1.42	1.43		1.04	1.15		1.12	1.64
	1.16	0.74		1.43	1.13		1.12	1.38		0.82	1.32
	0.88	0.75		1.31	1.79		0.95	1.15		1.47	1.71
