# Supplementary material for: C-C chemokine receptor 4 deficiency exacerbates early atherosclerosis in mice
Source: eLife. 2025 Jul 3;13:RP101830. doi: 10.7554/eLife.101830 (PMC12226018; doi:10.7554/eLife.101830)
Supplement: Figure 2—source data 1. [file elife-101830-fig2-data1.xlsx]

## Sheet: Fig2A
	Peripheral LNs													Spleen
	Foxp3+/CD4+						Cell number							Foxp3+/CD4+						Cell number
	8 W			18 W			8 W			18 W				8 W			18 W			8 W			18 W
	Apoe-/-	Ccr4-/-Apoe-/-		Apoe-/-	Ccr4-/-Apoe-/-		Apoe-/-	Ccr4-/-Apoe-/-		Apoe-/-	Ccr4-/-Apoe-/-			Apoe-/-	Ccr4-/-Apoe-/-		Apoe-/-	Ccr4-/-Apoe-/-		Apoe-/-	Ccr4-/-Apoe-/-		Apoe-/-	Ccr4-/-Apoe-/-
	7.35	7.86		7.97	10.6		0.80366	3.81466		0.79475	3.47269			6.45	8.79		6.58	10.9		2.09752	6.70206		7.11107	6.4781
	7.45	9.38		8.63	13.3		1.2659	3.49106		4.23108	5.09107			6.49	8.4		7.06	10.5		7.48814	5.97248		4.66797	9.45314
	6.79	9.31		8.72	10.8		1.29005	3.72189		2.21461	4.25409			6.46	8.37		8.48	11		2.54706	3.86508		8.93301	8.3284
	7.61	7.55		7.94	11.6		1.17066	2.53954		2.56704	4.60123			5.8	10		7.98	9.76		4.10229	5.9936		6.74944	9.59898
	7.39	7.73		8.27	12.7		1.27092	1.26822		1.62701	3.18423			6.17	9.3		7.61	12.7		9.15631	4.92221		6.07541	11.6328
	7	8.53		8.07	10.4		1.06428	1.8111		0.946972	3.69907			6.9	8.44		7.82	11.1		6.58563	8.94592		7.83534	4.33416
	6.86	6.78		8.59	8.51		1.17715	2.38585		1.05318	5.54958			6.84	9.38		9.94	12.7		4.84898	7.02189		9.99902	9.8703
	6.97	7.5		7.97	11.7		1.76942	1.97722		1.44965	6.19657			7.27	9.41		7.62	12.4		4.41986	6.02916		5.47622	7.92799
	6.98	8.55		8.89	10.3		1.5093	2.1035		1.26447	3.40748			6.69	10.6		7.04	13.2		4.27538	6.59178		5.9827	11.804
	6.88	7.96		8.49			1.86577	2.64521		1.38014				5.85	9.17		7.78	14.1		3.22718	5.54997		8.13767	6.81445

## Sheet: Fig2B
	Peripheral LNs													Spleen
	CD44highCD62Llow+/CD4+						Cell number							CD44highCD62Llow+/CD4+						Cell number
	8 W			18 W			8 W			18 W				8 W			18 W			8 W			18 W
	Apoe-/-	Ccr4-/-Apoe-/-		Apoe-/-	Ccr4-/-Apoe-/-		Apoe-/-	Ccr4-/-Apoe-/-		Apoe-/-	Ccr4-/-Apoe-/-			Apoe-/-	Ccr4-/-Apoe-/-		Apoe-/-	Ccr4-/-Apoe-/-		Apoe-/-	Ccr4-/-Apoe-/-		Apoe-/-	Ccr4-/-Apoe-/-
	5.82	8.21		7.41	16		0.66099	4.17022		0.6914	4.88219			14.8	19.7		31.7	45.9		5.29804	15.0393		10.7595	30.7848
	6.2	10.3		11.7	18.9		1.06193	3.9888		5.13627	6.80019			13.4	21.3		30.3	42.4		16.4086	14.9503		23.4834	26.2559
	8.42	9.45		11.4	23.2		1.67322	3.93961		2.83504	8.22625			15.5	21		30.3	42.3		6.80232	9.40363		17.3294	31.2324
	6.93	13.5		7.94	26.9		1.63128	4.74419		2.17359	9.2612			12.5	26.8		35	57.5		9.55697	15.7576		39.1087	34.1413
	6.4	8.15		9.8	27.4		1.14184	1.38935		1.87294	7.70099			13.6	19.7		28.8	46		21.8424	10.3092		15.5117	20.2544
	7.35	6.47		11.4	17.5		1.12323	1.40946		1.4017	6.91507			13.8	17.9		26.4	65		13.8036	20.1931		21.8523	43.1752
	5.37	5.41		9.21	24.6		0.934047	1.87434		1.14465	15.5836			14.3	18.6		24.2	49.9		10.4602	14.796		24.4769	33.8301
	11	5.67		10.4	16.2		2.88869	1.51528		1.91168	8.81297			16.9	21.6		30.6	56.1		11.1163	15.0466		32.1405	64.9011
	5.41	7.79		11.3	12.6		1.21563	1.96369		1.57782	4.42433			15.2	20.4		30.4	43.5		11.0027	13.3465		21.9473	24.5987
	5.11	6.34		9.66			1.44468	2.1498		1.54413				14.2	20.4		25.9	45		8.75687	13.4968		22.3959	34.1736

## Sheet: Fig2C
	Ki-67+/CD4+Foxp3+
	Peripheral LNs			Spleen
	Apoe-/-	Ccr4-/-Apoe-/-		Apoe-/-	Ccr4-/-Apoe-/-
	26.9	31.8		25.6	31.7
	27.3	28.8		29.9	30.5
	24.6	30		23.7	33.4
	22.1	31.5		25.2	34.3
	23.7	45.2		25.2	45.2
	23.6	27.1		25.1	28.4
	28.3	27.4		27.3	35.2
	22.7	29.3		25.8	40.7
	23.9	28.3		27.6	32
	29.7	28.6		35.5	33.3
	26.6	25.2		30.7	31.4
	32.5	35.9		29.5	41.3
	28.2	35.5		28.9	32.9

## Sheet: Fig2D
	Ki-67+/CD4+Foxp3-
	Peripheral LNs			Spleen
	Apoe-/-	Ccr4-/-Apoe-/-		Apoe-/-	Ccr4-/-Apoe-/-
	11.5	18.6		16.9	19.7
	11.6	12.7		17.3	22.1
	10.3	16.5		17.9	23.6
	10.7	14.7		17.3	23.6
	11.1	15.6		17.7	27.1
	10.9	12.1		16.4	19.8
	12	11.2		15.8	22.6
	9.12	10.8		17	25.2
	9.51	11.9		17.3	21.3
	11.7	14.9		18.4	24.5
	10.6	10.6		19.5	22.9
	11.2	18.7		16.6	24.4
	10.5	21.2		17.6	25.2

## Sheet: Fig2E
	Peripheral LNs
	CTLA-4						CD103
	8 W			18 W			8 W			18 W
	Apoe-/-	Ccr4-/-Apoe-/-		Apoe-/-	Ccr4-/-Apoe-/-		Apoe-/-	Ccr4-/-Apoe-/-		Apoe-/-	Ccr4-/-Apoe-/-
	1892	2466		2610	2363		1018	899		1152	1040
	1808	2126		2100	2433		786	875		945	975
	1820	2190		2753	2655		870	775		1235	1061
	1857	2147		2190	2513		877	825		962	959
	1641	1625		2531	2678		889	667		1262	807
	2171	1898		3046	2336		1200	885		1463	1040
	1724	1438		2571	2666		957	722		1310	1404
	2229	1995		2403	2353		1140	797		1170	1246
	1772	1968		2552	2681		930	825		1254	1070
	1498	1932		2564			860	910		1234

## Sheet: Fig2F
	Rerative expression
	Foxp3			Ctla4			Cd103			Tnfrsf18			Il10			Tgfb
	Apoe-/-	Ccr4-/-Apoe-/-		Apoe-/-	Ccr4-/-Apoe-/-		Apoe-/-	Ccr4-/-Apoe-/-		Apoe-/-	Ccr4-/-Apoe-/-		Apoe-/-	Ccr4-/-Apoe-/-		Apoe-/-	Ccr4-/-Apoe-/-
	1	1		1	1.38		0.97	1.61		1.3	1.41		0.77	1.4		0.62	0.97
	1	1.01		0.98	1.24		0.87	1.41		1.09	1.13		1.04	1.33		1.47	1.23
	1	1.01		1.1	0.93		0.8	1.14		0.85	0.89		0.46	0.67		0.88	0.71
	1.01	1.01		0.75	1.1		0.81	0.76		0.84	0.88		0.43	0.85		0.63	0.62
	1	1		1.13	1.07		1.52	1.53		0.85	0.97		1.55	1.58		1.2	1.71
	0.99	1.01		1.21	1		0.96	1		1.41	1.27		0.97	1.96		1.3	1.3
	1	1.01		0.99	0.84		1.19	1.33		0.92	0.84		1.42	0.63		1.08	1.32
	1	1		0.85	0.98		0.88	0.87		0.75	0.96		1.36	1.14		0.82	0.97

## Sheet: Fig2G
	CTLA-4						CD103
	8 W			18 W			8 W			18 W
	Apoe-/-	Ccr4-/-Apoe-/-		Apoe-/-	Ccr4-/-Apoe-/-		Apoe-/-	Ccr4-/-Apoe-/-		Apoe-/-	Ccr4-/-Apoe-/-
	258	303		344	371		439	407		494	518
	245	314		325	470		416	376		450	478
	236	327		392	472		354	382		530	497
	250	383		302	420		380	339		473	490
	218	241		366	498		379	326		553	445
	256	267		316	393		412	426		532	510
	223	196		288	495		394	351		508	615
	284	227		296	392		370	364		511	509
	214	270		287	393		414	377		446	551
	195	257		300			367	393		493
