# Supplementary material for: C-C chemokine receptor 4 deficiency exacerbates early atherosclerosis in mice
Source: eLife. 2025 Jul 3;13:RP101830. doi: 10.7554/eLife.101830 (PMC12226018; doi:10.7554/eLife.101830)
Supplement: Figure 3—source data 1. [file elife-101830-fig3-data1.xlsx]

## Sheet: Fig3A
	IFN-γ+/CD4+			IL-4+/CD4+			IL-10+/CD4+			IL-17+/CD4+
	Apoe-/-	Ccr4-/-Apoe-/-		Apoe-/-	Ccr4-/-Apoe-/-		Apoe-/-	Ccr4-/-Apoe-/-		Apoe-/-	Ccr4-/-Apoe-/-
	2.49	3.01		0.87	1.17		0.32	0.52		0.41	0.55
	2.65	2.97		1.2	1.1		0.32	0.45		0.53	0.75
	2.54	5.47		1.17	1.13		0.47	0.35		0.4	0.72
	2.61	3.05		0.8	0.87		0.31	0.7		0.54	0.73
	2.18	3.78		0.73	1.03		0.31	0.55		0.44	0.73
	2.92	3.5		1.57	2.05		0.57	0.82		0.55	0.5
	3.2	3.2		1.5	1.75		0.82	0.47		1.05	0.38
	2.43	3.53		0.91	1.45		0.52	0.43		0.46	0.38
	2.76	3.11		1.01	1.4		0.44	0.44		0.72	0.66
	2.72	3.36		1.15	1.39		0.63	0.45		0.67	0.36
	3.08			1.51	1.28		0.43	0.37		0.89

## Sheet: Fig3B
	IFN-γ+/CD4+			IL-4+/CD4+			IL-10+/CD4+			IL-17+/CD4+
	Apoe-/-	Ccr4-/-Apoe-/-		Apoe-/-	Ccr4-/-Apoe-/-		Apoe-/-	Ccr4-/-Apoe-/-		Apoe-/-	Ccr4-/-Apoe-/-
	3.88	9.93		1.27	3.04		1.9	3.99		0.91	0.93
	4.74	7.8		1.33	1.65		1.21	1.81		0.27	1.03
	4.29	5.1		0.93	1.5		1.17	1.27		0.27	1.02
	3.91	4.96		1.38	1.76		1.51	1.29		1.47	1.72
	4.76	6.53		0.94	1.11		0.98	1.43		0.24	1.37
	5.73	5.17		1.12	1.38		1.39	1.72		0.99	0.58
	7.22	13		1.04	0.65		0.27	0.6		0.63	1.89
	7.19	13.3		1.27	1.62		0.35	0.6		1.29	1.36
	7.42	8.73		1.22	0.92		0.29	0.42		0.67	1.34
	7.31	9.1		0.9	0.93		0.36	0.41		1	0.56
	7.48	9.32		1.09	1.21		0.24	0.6		0.49	2.53

## Sheet: Fig3C
	Left
	GM-CSF			IL-2			IL-3			MIP-1α			MIP-1β			TNF-α
	Apoe-/-	Ccr4-/-Apoe-/-		Apoe-/-	Ccr4-/-Apoe-/-		Apoe-/-	Ccr4-/-Apoe-/-		Apoe-/-	Ccr4-/-Apoe-/-		Apoe-/-	Ccr4-/-Apoe-/-		Apoe-/-	Ccr4-/-Apoe-/-
	753.08	2514.42		22304.2	23039.2		3659.45	13026.6		10794.9	24685		25539.8	26636.9		1656.32	4372.29
	Right
	I-309			sICAM-1			IFN-γ			IL-13			IL-17			RANTES			SDF-1
	Apoe-/-	Ccr4-/-Apoe-/-		Apoe-/-	Ccr4-/-Apoe-/-		Apoe-/-	Ccr4-/-Apoe-/-		Apoe-/-	Ccr4-/-Apoe-/-		Apoe-/-	Ccr4-/-Apoe-/-		Apoe-/-	Ccr4-/-Apoe-/-		Apoe-/-	Ccr4-/-Apoe-/-
	157.5	366.01		639.34	1121.9		368.71	721.53		91.72	449.76		239.63	1573.77		181.24	524.9		314.42	407.65

## Sheet: Fig3D
	IFN-γ+/CD4+			IL-4+/CD4+			IL-10+/CD4+			IL-17+/CD4+
	Apoe-/-	Ccr4-/-Apoe-/-		Apoe-/-	Ccr4-/-Apoe-/-		Apoe-/-	Ccr4-/-Apoe-/-		Apoe-/-	Ccr4-/-Apoe-/-
	1.6873	2.93041		8.44	16.28		55.47	94.18		27.63	90.44
	0.84947	1.4523		9	2.85		31.96	70.37		13.74	30.82
	1.32219	3.67949		6.27	92.14		39.15	158.52		6.59	86.01
	0.77634	2.30945		44.08	17.44		21.37	65.79		13.14	22.41
	1.33537	4.59907		13.79	195.12		54.48	173.5		32.92	306.57
	1.73709	2.74427		4.19	251.75		45.12	221.95		39.97	327.77
	0.82149	2.45653		8.81	28.03		35.55	87.85		15.83	52.13
	0.70805	2.77906			136.88		23.8	198.86		8.85	171.99
