# Supplementary material for: C-C chemokine receptor 4 deficiency exacerbates early atherosclerosis in mice
Source: eLife. 2025 Jul 3;13:RP101830. doi: 10.7554/eLife.101830 (PMC12226018; doi:10.7554/eLife.101830)
Supplement: Figure 4—figure supplement 1—source data 1. [file elife-101830-fig4-figsupp1-data1.xlsx]

## Sheet: Figure 4–figure supplement 1
	MFI
	CTLA-4			CD103			PD-1
	Apoe-/-	Ccr4-/-Apoe-/-		Apoe-/-	Ccr4-/-Apoe-/-		Apoe-/-	Ccr4-/-Apoe-/-
	1885	1890		1016	786		1495	1215
	1621	1835		1002	851		1451	1270
	1764	1860		952	887		1507	1399
	1729	1658		990	952		1986	1219
	1603	1647		925	898		1410	1536
	2596	1436		1048	768		1529	1720
	1973	1513		923	837		1119	1338
	1826	1932		786	996		1663	1182
	1879	1792		808	821		1641	1558
	2065	1755		913	903			1710
