# Supplementary material for: C-C chemokine receptor 4 deficiency exacerbates early atherosclerosis in mice
Source: eLife. 2025 Jul 3;13:RP101830. doi: 10.7554/eLife.101830 (PMC12226018; doi:10.7554/eLife.101830)
Supplement: Figure 4—figure supplement 2—source data 1. [file elife-101830-fig4-figsupp2-data1.xlsx]

## Sheet: Figure 4–figure supplement 2
	Relative expression
	Ccr5			Ccr6			Ccr7			Ccr8
	Apoe-/-	Ccr4-/-Apoe-/-		Apoe-/-	Ccr4-/-Apoe-/-		Apoe-/-	Ccr4-/-Apoe-/-		Apoe-/-	Ccr4-/-Apoe-/-
	0.87	0.6		1.19	1.65		0.88	0.36		0.74	0.78
	0.62	0.4		0.37	0.62		0.37	0.51		0.39	0.59
	0.98	0.57		1.31	1.64		1.58	0.99		1.48	1.55
	1.52	1.47		1.14	1.76		1.17	3.84		1.4	3.29
	Ccr5			Ccr6			Ccr7
	Apoe-/-	Ccr4-/-Apoe-/-		Apoe-/-	Ccr4-/-Apoe-/-		Apoe-/-	Ccr4-/-Apoe-/-
	1.95	1.56		1.23	0.62		1.2	0.76
	1.52	1.12		0.62	0.64		0.81	1.04
	0.3	1.34		0.77	1.66		1.29	0.77
	0.23	1.55		1.38	0.8		0.7	1.55
	Ccr8			Cxcr3
	Apoe-/-	Ccr4-/-Apoe-/-		Apoe-/-	Ccr4-/-Apoe-/-
	0.84	1.15		0.73	0.74
	1.24	0.84		0.52	1.16
	1.09	1.01		1.15	1.21
	0.83	1.41		1.6	1.32
