# Supplementary material for: C-C chemokine receptor 4 deficiency exacerbates early atherosclerosis in mice
Source: eLife. 2025 Jul 3;13:RP101830. doi: 10.7554/eLife.101830 (PMC12226018; doi:10.7554/eLife.101830)
Supplement: Figure 4—source data 1. [file elife-101830-fig4-data1.xlsx]

## Sheet: Fig4A
	Foxp3+/CD4+			Cell number
	Apoe-/-	Ccr4-/-Apoe-/-		Apoe-/-	Ccr4-/-Apoe-/-
	8.05	12.8		0.4383	9.1415
	11.3	13.7		2.8522	1.6066
	10.1	15.3		1.7054	4.0675
	9.58	18		3.6848	2.2431
	11.2	12.7		1.687	2.9303
	10.3	20.5		0.603734	7.89842
	9.18	13.6		1.48472	2.96514
	11.4	15.2		1.51824	5.44108
	9.93	13.7		1.22202	7.46466
	10.8	17		0.402132	5.57314

## Sheet: Fig4B
	Foxp3+/CD4+			Cell number
	Apoe-/-	Ccr4-/-Apoe-/-		Apoe-/-	Ccr4-/-Apoe-/-
	24.7	22.5		4.9484	14.1464
	22.7	17.7		3.4013	1.6754
	20.6	25.1		6.7871	5.5295
	26.2	29.7		3.2067	2.8294
	10.4	22.1		1.21439	3.6772
	12.1	40.7		3.50996	19.5589
	21.6	21		4.94944	6.77783
	24.1	23.9		4.5164	12.2724
	12.2	11.9		1.23518	13.2606
		11.4			8.14568

## Sheet: Fig4C
	Rerative expression
	Foxp3			Ctla4			Cd103			Tnfrsf18			Il10			Tgfb
	Apoe-/-	Ccr4-/-Apoe-/-		Apoe-/-	Ccr4-/-Apoe-/-		Apoe-/-	Ccr4-/-Apoe-/-		Apoe-/-	Ccr4-/-Apoe-/-		Apoe-/-	Ccr4-/-Apoe-/-		Apoe-/-	Ccr4-/-Apoe-/-
	0.81	0.69		0.88	0.64		0.86	0.72		0.9	0.7		1.12	0.75		0.91	0.73
	0.44	0.66		0.56	0.6		0.51	0.63		0.45	0.71		0.48	0.49		0.82	0.61
	1.6	1.3		1.62	1.51		1.32	1.31		1.63	1.34		0.85	0.54		1.16	1.04
	1.15	1.25		0.94	2.96		1.31	1.04		1.01	1.13		1.56	0.53		1.11	1.09

## Sheet: Fig4D
	Rerative expression
	Ctla4			Cd44			Cd69			Cd103			Tbx21			Gata3
	Apoe-/-	Ccr4-/-Apoe-/-		Apoe-/-	Ccr4-/-Apoe-/-		Apoe-/-	Ccr4-/-Apoe-/-		Apoe-/-	Ccr4-/-Apoe-/-		Apoe-/-	Ccr4-/-Apoe-/-		Apoe-/-	Ccr4-/-Apoe-/-
	1.08	0.91		1.14	0.79		1.15	1.13		0.94	1.3		0.83	1.19		1.08	1.15
	0.91	0.8		0.89	0.63		1.11	0.93		1.09	1.27		0.94	1.78		0.9	0.54
	1.06	1.2		1.03	1.48		1.15	1.06		0.82	2.32		0.9	1.72		1.07	1.16
	0.95	3.38		0.94	1.32		0.59	2.26		1.15	1.38		1.34	2.18		0.95	1.22

## Sheet: Fig4E
	IFN-γ+/CD4+			IL-4+/CD4+			IL-10+/CD4+			IL-17+/CD4+
	Apoe-/-	Ccr4-/-Apoe-/-		Apoe-/-	Ccr4-/-Apoe-/-		Apoe-/-	Ccr4-/-Apoe-/-		Apoe-/-	Ccr4-/-Apoe-/-
	6.54	7.71		1.86	2.36		1.36	1.46		2.95	1.74
	3.57	7.53		1	2.08		1.3	2.24		1.87	3.5
	5.55	7.66		1.01	2.77		1.22	2.08		1.47	5.83
	5.76	11.3		1.51	1.89		1.34	2.15		1.68	8.83
	5.67	8.81		1.29	2.33		1.38	2		1.94	2.05
	4.71	8.21		1.91	1.86		1.56	1.36		1.42	3.97
	5.13	5.8		1.29	1.72		1.31	1.39		0.73	2.73
	7.25	8.25		1.42	1.94		2.83	1.89		2.63	5.49
	8.01	7.9		1.82	1.99		1.94	2.39		1.3	7.98
	3.34	7.85		0.7	2.2		1.88	3.7		0.73	2.15
	4.58	7.03		1.05	2.11		3.28	1.88		0.99	0.8
	4.43	6.55		1.13	1.2		2.5	2.45		2.66	1.15

## Sheet: Fig4F-J
	T-bet+/CD4+			GATA3+/CD4+			RORγt+/CD4+			Foxp3+/CD4+			Th1 cell/Treg ratio
	Apoe-/-	Ccr4-/-Apoe-/-		Apoe-/-	Ccr4-/-Apoe-/-		Apoe-/-	Ccr4-/-Apoe-/-		Apoe-/-	Ccr4-/-Apoe-/-		Apoe-/-	Ccr4-/-Apoe-/-
	0.7	0.5		0.9	3.79		9.93	11.4		4.47	19		0.7	0.5
	0.35	0.72		0.22	0.97		8.24	6.23		8.4	7.27		0.35	0.72
	0.39	0.69		9.26	3.57		14.9	12.7		8.72	6.5		0.39	0.69
	0.5	0.6		0.23	3.23		13.3	12.5		3.6	6.17		0.5	0.6
	0.34	0.5		4.44	8.47		14.7	14.1		13.2	13		0.34	0.5
	0.48	1.79		7.06	7.12		36.7	28.8		11.7	6.63		0.48	1.79
	1.21	1.13		5.02	9.91		8.75	28.8		5.29	8.2		1.21	1.13
	0.36	0.78		9.33	2.97		8.75	5.8		9.66	10.2		0.36	0.78
	0.37	0.42		6.38	7.27		6.91	18.2		9.88	12.9		0.37	0.42
