# Supplementary material for: C-C chemokine receptor 4 deficiency exacerbates early atherosclerosis in mice
Source: eLife. 2025 Jul 3;13:RP101830. doi: 10.7554/eLife.101830 (PMC12226018; doi:10.7554/eLife.101830)
Supplement: Figure 5—source data 1. [file elife-101830-fig5-data1.xlsx]

## Sheet: Fig1A
	Average lesion area					Lesion area
	Apoe-/-	Ccr4-/-Apoe-/-				0 (µm)			150 (µm)			300 (µm)			450 (µm)			600 (µm)
	0.968978	2.18924				Apoe-/-	Ccr4-/-Apoe-/-		Apoe-/-	Ccr4-/-Apoe-/-		Apoe-/-	Ccr4-/-Apoe-/-		Apoe-/-	Ccr4-/-Apoe-/-		Apoe-/-	Ccr4-/-Apoe-/-
	1.23304	3.43596				0.493778	3.19433		0.220889	2.99922		1.066	2.62011		1.30256	1.41956		1.76167	0.713
	1.26109	1.99878				0.259444	1.938		2.00178	3.76233		1.76022	4.26444		1.45467	4.15489		0.689111	3.06011
	1.23711	0.853543				1.63989	2.02288		0.333444	1.91253		2.07667	1.9203		1.58189	2.73017		0.673556	1.40804
	0.974979	2.50132				0.939111	0.770065		1.21278	1.73085		1.29767	1.60884		1.81033	0.157962		0.925667	0
	2.13182	1.1985				0.289852	0		1.17067	0.745526		1.65511	2.32686		1.31627	4.7311		0.442998	4.70314
	1.13249	1.68069				1.29882	1.81321		2.07142	1.68134		3.34703	0.896469		2.62758	0.71731		1.31424	0.884194
	1.31764	1.17943				1.53518	0.724742		1.52842	1.65589		1.61322	2.10362		0.985654	2.10813		0	1.81107
	2.13439	1.93692				1.92063	0.63094		1.137	0.239967		0.656615	1.08689		1.91714	2.27186		0.956826	1.66749
	1.36059	2.31812				2.41915	2.71453		4.13957	2.8807		1.67582	2.96426		1.35917	1.1251		1.07822	0
	1.509	1.65578				1.0443	2.58692		1.10237	2.37501		1.89936	2.19634		1.64739	1.79058		1.10952	2.64174
	0.798557	1.87003				0.874359	0.731002		2.19868	3.01453		2.27387	3.17153		1.64283	0.972468		0.555252	0.38938
	1.21362	1.69448				1.57867	0.704176		1.46866	2.90294		0.302733	2.74381		0.144639	1.98896		0.498078	1.01026
	1.1028	1.47017				0.864371	1.45597		1.0133	1.2799		1.87548	2.24557		1.61363	1.86148		0.70131	1.62949
	1.1846	0.771998				0.233743	1.36166		1.16634	1.94644		1.68295	2.11534		1.41234	1.44877		1.01862	0.478647
	1.1034	3.27604				0.70041	0.566082		2.28167	0.74262		1.82923	0.437262		1.1117	0.944317		0	1.16971
	2.70936	1.62831				0.612725	2.16691		0.86085	2.91887		1.31791	4.19335		1.87254	3.91142		0.852963	3.18965
	1.24735	1.76336				0.1223	0		1.67815	0.602791		4.44093	2.3203		4.18521	2.4361		3.12021	2.78234
	1.33724	2.05997				0.346856	0.595351		1.85146	2.24058		1.94057	2.54066		1.30602	2.51139		0.791854	0.928843
	2.00717	2.1134				1.66243	1.80899		1.73206	1.90059		1.82652	2.45063		1.31955	2.79776		0.145619	1.34187
	1.80623	3.65681				0.287802	0.79232		1.00413	1.32433		3.2216	2.72901		2.6187	3.2762		2.90364	2.44512
	1.90944	1.99669				1.22484	1.61847		1.32428	3.53621		1.51992	4.88046		2.79234	5.39187		2.16978	2.85705
	1.00695	3.75419				0.558237	1.2029		2.00855	2.41939		2.33536	2.70513		2.50457	2.1858		2.14048	1.47023
	2.37364					0.308713	1.74567		0.331977	4.76787		1.37062	4.10638		1.5875	4.18848		1.43593	3.96257
						0.625189			2.70662			3.18327			3.3142			2.03891

## Sheet: Fig1B
	Lesion area
	Apoe-/-	Ccr4-/-Apoe-/-
	4.38	11.89
	3.56	2.88
	2.66	4.53
	3.17	2.54
	2.52	3.14
	3.59	4.25
	5.85	4.17
	3.42	3.58
	8.34	3.95
	3.81	6.24
	4.61	3.75
	4.31	4.32
	3.88	11.39
	3.78	3.75
	6.16	3.67

## Sheet: Fig1C
	Macrophage area
	Apoe-/-	Ccr4-/-Apoe-/-
	29.296	36.936
	29.3344	42.3148
	26.8618	32.6041
	35.1755	27.0353
	38.3053	28.7488
	22.3171	31.8106
	24.8624	34.3432
	34.3817	40.9002
	19.0335	34.7531
	30.5706	38.9907

## Sheet: Fig1D
	CD4 T cells/mm2
	Apoe-/-	Ccr4-/-Apoe-/-
	20.4442	71.8617
	31.4765	40.814
	58.496	52.1981
	34.8482	53.0625
	22.0711	45.2271
	20.3947	26.5197
	33.9719	52.9589
	47.0211	41.1367
	54.025	36.348
	22.3886	68.7504

## Sheet: Fig1E
	Collagen area
	Apoe-/-	Ccr4-/-Apoe-/-
	46.1115	26.8634
	38.4734	24.1963
	36.6875	34.7772
	42.3838	38.1136
	48.5238	32.309
	49.8158	35.5955
	25.4419	30.2776
	27.852	24.8908
	29.1112	35.2961
	47.2579	37.5034

## Sheet: Fig1F
	Rerative expression
	Il1b			Il6			Il10			Tnf			Ifng			Tbx21			Gata3			Rorc
	Apoe-/-	Ccr4-/-Apoe-/-		Apoe-/-	Ccr4-/-Apoe-/-		Apoe-/-	Ccr4-/-Apoe-/-		Apoe-/-	Ccr4-/-Apoe-/-		Apoe-/-	Ccr4-/-Apoe-/-		Apoe-/-	Ccr4-/-Apoe-/-		Apoe-/-	Ccr4-/-Apoe-/-		Apoe-/-	Ccr4-/-Apoe-/-
	0.59	1.33		0.69	3.61		1.23	1.32		1.8	1.17		0.07	1.16		0.42	5.28		0.42	1.6		1.34	2.78
	0.66	1.66		0.09	5.08		2.66	2.13		1.46	0.9		1.11	1.08		0.75	2.01		0.57	1.04		1.07	2.53
	0.87	1.56		2.08	2.19		0.85	3.35		0.82	1.38		3.38	3.37		0.79	2.79		0.28	2.43		0.87	1.89
	0.62	0.55		1.21	0.62		0.53	0.12		0.67	2		0.72	1.46		2.17	7.11		0.18	1.77		1.97	5.38
	0.79	1.25		1.58	3.79		0.34	0.64		0.65	1.15		1.86	1.18		2	2.83		0.47	1.75		0.71	3.7
	0.43	2.28		1.21	1.56		1.42	1.13		1.21	2.88		0.23	2.47		0.55	6.29		0.39	1.99		1.33	3.13
	0.44	0.5		0.43	1.04		0.5	0.39		0.45	0.84		0.55	1		0.91	1.17		0.46	0.47		0.65	1.61
	0.47	2.38		0.14	4.71		0.68	1.99		0.98	0.54		0.07	0.67		0.43	1.81		4.45	0.85		0.59	0.92
	4.14	5.23		1.57	1.06		0.79	1.61		0.96	0.76					1.43			1.78	0.83		0.46
	0.64			0.16			0.85			0.86									1.05			1.31

## Sheet: Fig2A
	Peripheral LNs													Spleen
	Foxp3+/CD4+						Cell number							Foxp3+/CD4+						Cell number
	8 W			18 W			8 W			18 W				8 W			18 W			8 W			18 W
	Apoe-/-	Ccr4-/-Apoe-/-		Apoe-/-	Ccr4-/-Apoe-/-		Apoe-/-	Ccr4-/-Apoe-/-		Apoe-/-	Ccr4-/-Apoe-/-			Apoe-/-	Ccr4-/-Apoe-/-		Apoe-/-	Ccr4-/-Apoe-/-		Apoe-/-	Ccr4-/-Apoe-/-		Apoe-/-	Ccr4-/-Apoe-/-
	7.35	7.86		7.97	10.6		0.80366	3.81466		0.79475	3.47269			6.45	8.79		6.58	10.9		2.09752	6.70206		7.11107	6.4781
	7.45	9.38		8.63	13.3		1.2659	3.49106		4.23108	5.09107			6.49	8.4		7.06	10.5		7.48814	5.97248		4.66797	9.45314
	6.79	9.31		8.72	10.8		1.29005	3.72189		2.21461	4.25409			6.46	8.37		8.48	11		2.54706	3.86508		8.93301	8.3284
	7.61	7.55		7.94	11.6		1.17066	2.53954		2.56704	4.60123			5.8	10		7.98	9.76		4.10229	5.9936		6.74944	9.59898
	7.39	7.73		8.27	12.7		1.27092	1.26822		1.62701	3.18423			6.17	9.3		7.61	12.7		9.15631	4.92221		6.07541	11.6328
	7	8.53		8.07	10.4		1.06428	1.8111		0.946972	3.69907			6.9	8.44		7.82	11.1		6.58563	8.94592		7.83534	4.33416
	6.86	6.78		8.59	8.51		1.17715	2.38585		1.05318	5.54958			6.84	9.38		9.94	12.7		4.84898	7.02189		9.99902	9.8703
	6.97	7.5		7.97	11.7		1.76942	1.97722		1.44965	6.19657			7.27	9.41		7.62	12.4		4.41986	6.02916		5.47622	7.92799
	6.98	8.55		8.89	10.3		1.5093	2.1035		1.26447	3.40748			6.69	10.6		7.04	13.2		4.27538	6.59178		5.9827	11.804
	6.88	7.96		8.49			1.86577	2.64521		1.38014				5.85	9.17		7.78	14.1		3.22718	5.54997		8.13767	6.81445

## Sheet: Fig2B
	Peripheral LNs													Spleen
	CD44highCD62Llow+/CD4+						Cell number							CD44highCD62Llow+/CD4+						Cell number
	8 W			18 W			8 W			18 W				8 W			18 W			8 W			18 W
	Apoe-/-	Ccr4-/-Apoe-/-		Apoe-/-	Ccr4-/-Apoe-/-		Apoe-/-	Ccr4-/-Apoe-/-		Apoe-/-	Ccr4-/-Apoe-/-			Apoe-/-	Ccr4-/-Apoe-/-		Apoe-/-	Ccr4-/-Apoe-/-		Apoe-/-	Ccr4-/-Apoe-/-		Apoe-/-	Ccr4-/-Apoe-/-
	5.82	8.21		7.41	16		0.66099	4.17022		0.6914	4.88219			14.8	19.7		31.7	45.9		5.29804	15.0393		10.7595	30.7848
	6.2	10.3		11.7	18.9		1.06193	3.9888		5.13627	6.80019			13.4	21.3		30.3	42.4		16.4086	14.9503		23.4834	26.2559
	8.42	9.45		11.4	23.2		1.67322	3.93961		2.83504	8.22625			15.5	21		30.3	42.3		6.80232	9.40363		17.3294	31.2324
	6.93	13.5		7.94	26.9		1.63128	4.74419		2.17359	9.2612			12.5	26.8		35	57.5		9.55697	15.7576		39.1087	34.1413
	6.4	8.15		9.8	27.4		1.14184	1.38935		1.87294	7.70099			13.6	19.7		28.8	46		21.8424	10.3092		15.5117	20.2544
	7.35	6.47		11.4	17.5		1.12323	1.40946		1.4017	6.91507			13.8	17.9		26.4	65		13.8036	20.1931		21.8523	43.1752
	5.37	5.41		9.21	24.6		0.934047	1.87434		1.14465	15.5836			14.3	18.6		24.2	49.9		10.4602	14.796		24.4769	33.8301
	11	5.67		10.4	16.2		2.88869	1.51528		1.91168	8.81297			16.9	21.6		30.6	56.1		11.1163	15.0466		32.1405	64.9011
	5.41	7.79		11.3	12.6		1.21563	1.96369		1.57782	4.42433			15.2	20.4		30.4	43.5		11.0027	13.3465		21.9473	24.5987
	5.11	6.34		9.66			1.44468	2.1498		1.54413				14.2	20.4		25.9	45		8.75687	13.4968		22.3959	34.1736

## Sheet: Fig2C
	Peripheral LNs			Spleen
	Apoe-/-	Ccr4-/-Apoe-/-		Apoe-/-	Ccr4-/-Apoe-/-
	26.9	31.8		25.6	31.7
	27.3	28.8		29.9	30.5
	24.6	30		23.7	33.4
	22.1	31.5		25.2	34.3
	23.7	45.2		25.2	45.2
	23.6	27.1		25.1	28.4
	28.3	27.4		27.3	35.2
	22.7	29.3		25.8	40.7
	23.9	28.3		27.6	32
	29.7	28.6		35.5	33.3
	26.6	25.2		30.7	31.4
	32.5	35.9		29.5	41.3
	28.2	35.5		28.9	32.9

## Sheet: Fig2D
	Peripheral LNs			Spleen
	Apoe-/-	Ccr4-/-Apoe-/-		Apoe-/-	Ccr4-/-Apoe-/-
	11.5	18.6		16.9	19.7
	11.6	12.7		17.3	22.1
	10.3	16.5		17.9	23.6
	10.7	14.7		17.3	23.6
	11.1	15.6		17.7	27.1
	10.9	12.1		16.4	19.8
	12	11.2		15.8	22.6
	9.12	10.8		17	25.2
	9.51	11.9		17.3	21.3
	11.7	14.9		18.4	24.5
	10.6	10.6		19.5	22.9
	11.2	18.7		16.6	24.4
	10.5	21.2		17.6	25.2

[truncated: 8 more sheets: Fig2E, Fig2F, Fig2G, Fig3A, Fig5A, Fig5C, Fig5D, Fig5E-I]
