# Supplementary material for: C-C chemokine receptor 4 deficiency exacerbates early atherosclerosis in mice
Source: eLife. 2025 Jul 3;13:RP101830. doi: 10.7554/eLife.101830 (PMC12226018; doi:10.7554/eLife.101830)
Supplement: Figure 6—figure supplement 1—source data 1. [file elife-101830-fig6-figsupp1-data1.xlsx]

## Sheet: Figure 6–figure supplement 1
	Average lesion area
	Saline	Apoe-/- Treg	Ccr4-/-Apoe-/- Treg
	1.09688	0.76534	1.18298
	0.859287	0.791086	0.37089
	1.30004	1.47049	1.19407
	0.764456	1.37507	2.16795
	0.859459	0.302482	0.675645
	0.52239	1.0951	0.938661
	0.39847	0.811654	2.27527
	0.664261	1.41679	1.8278
	0.738581	0.947198	1.38663
	1.07781	0.841189	0.8369
	1.06629	0.856196	0.34711
	0.893004	0.849369	0.64119
	0.832153	0.87985	0.880811
	0.573693	1.83109	0.719711
	0.579104	0.949691	1.49346
	1.96198	0.831931	0.911536
	1.15356	0.811992	2.11127
	1.4285		1.91445
			0.723791
			1.29507
