# Supplementary material for: C-C chemokine receptor 4 deficiency exacerbates early atherosclerosis in mice
Source: eLife. 2025 Jul 3;13:RP101830. doi: 10.7554/eLife.101830 (PMC12226018; doi:10.7554/eLife.101830)
Supplement: Figure 6—figure supplement 2—source data 1. [file elife-101830-fig6-figsupp2-data1.xlsx]

## Sheet: Figure 6–figure supplement 2
	Lesion area
	0 (µm)				150 (µm)				300 (µm)				450 (µm)				600 (µm)
	Saline	Apoe-/- Treg	Ccr4-/-Apoe-/- Treg		Saline	Apoe-/- Treg	Ccr4-/-Apoe-/- Treg		Saline	Apoe-/- Treg	Ccr4-/-Apoe-/- Treg		Saline	Apoe-/- Treg	Ccr4-/-Apoe-/- Treg		Saline	Apoe-/- Treg	Ccr4-/-Apoe-/- Treg
	0.788506	0.334803	2.1579		1.65138	0.758325	3.08907		1.24569	0.953825	2.29263		1.44487	1.21643	1.52084		0.874571	0.816674	0.730972
	0.833067	0.361461	0.829788		1.19574	0.920081	0.519783		0.830804	0.863905	0.516578		0.467669	1.08344	0.0955292		0.403549	0.688223	0.0134024
	0.421776	0.811551	0.401601		0.53426	0.274433	0.448109		0.953661	0.495518	1.1882		0.757651	0.575286	0.753926		0.600898	0.494976	0.478702
	0.534825	0.13214	1.03702		1.17971	0.228354	1.51076		0.754691	0.298544	1.22322		0.42196	0.417094	0.6429		0.200017	0.555993	0.262648
	0.158696	0.149467	0.420245		0.181661	0.785174	0.550381		0.325072	1.10913	0.571483		0.419165	0.900188	0.383142		0.713846	0.489664	0.386261
	1.11397	0.762759	0.125293		0.745218	0.945562	1.07198		0.534417	1.11006	3.23313		0.115933	1.15721	1.06259		0.181992	0.784985	0.465191
	0.604623	0.505387	0.156241		0.992205	0.546968	0.089275		0.962515	0.655341	0.14471		0.612366	0.906365	0.525397		0.25752	0.843976	1.08974
	0.295729	0	0.549815		0.196958	0.113562	1.0409		0.294199	0.0563457	1.2314		0.0929798	0.422284	0.933876		0.270417	0.207953	0.353292
	0.0875464	0	1.02182		1.47494	0.0826719	1.01179		2.51167	0.328516	0.833912		1.90552	0.361722	0.959029		1.28	0.0960917	0.962237
	1.3503	0.689077	0.0425054		1.29012	1.64335	0.108231		1.27454	1.69337	0.577534		0.688214	0.822996	1.10555		0.244986	0.306967	1.06536
	1.45311	0.153075	0.148644		2.2706	0.160537	0.413533		2.11616	0.683798	0.537329		0.987545	0.803165	0.658614		0.165139	1.10144	0.447094
	0.545633	0.969698	0.584202		0.958077	0.771012	0.568123		1.22307	0.977026	0.495093		0.28234	0.60495	0.592269		0.983655	0.527515	0.96892
	0	0.391342	0.169486		0.492807	1.34552	0.638738		0.867087	1.50019	0.606527		1.23971	1.24849	0.279213		0.932356	0.467064	0.133688
	1.35884	0	0.325735		1.56396	0.805038	0.772854		1.4855	2.09595	0.96917		0.962126	2.18856	0.500242		0.276249	1.52099	0.195886
	0	1.0247	0.1198		0.386974	2.05097	0.447798		1.2533	1.66096	0.375154		0.778263	1.22693	0.660936		0.570913	0.488835	0.200592
	0.133861	0.278213	0.103413		1.05956	0.278465	0.11195		1.90228	0.0860559	0.179852		2.00156	0.453461	0.300268		1.30619	0.374003	0.220959
	0.647168	0.869101	0.795117		1.45941	0.907004	1.37386		1.29864	0.853062	1.28212		0.866154	0.204797	0.924735		0.170275	0.0935341	0.570807
	0.0811021	0.595406	0.427894		0.11299	0.823934	1.10763		0.458203	0.691143	1.02391		0.565885	0.174543	0.539091		0.524527	0.299371	0.576037
	0.662341	0.476552	0.630177		0.588771	0.620431	1.11809		0.718477	1.72748	1.63561		0.586081	1.43591	1.17203		0.718155	0.587455	0.886074
		0.742295	0.867555			0.670555	1.20541			0.69179	1.19879			0.685656	0.729717			0.413725	0.188507
	Maximum lesion area
	Saline	Apoe-/- Treg	Ccr4-/-Apoe-/- Treg
	1.65	1.22	3.09
	1.2	1.08	0.83
	0.95	0.81	1.19
	1.18	0.56	1.51
	0.71	1.11	0.57
	1.11	1.16	3.23
	0.99	0.91	1.09
	0.3	0.42	1.23
	2.51	0.36	1.02
	1.35	1.69	1.11
	2.27	1.1	0.66
	1.22	0.98	0.97
	1.24	1.5	0.64
	1.56	2.19	0.97
	1.25	2.05	0.66
	2	0.45	0.3
	1.46	0.91	1.37
	0.57	0.82	1.11
	0.72	1.73	1.64
		0.74	1.21
