# Supplementary material for: C-C chemokine receptor 4 deficiency exacerbates early atherosclerosis in mice
Source: eLife. 2025 Jul 3;13:RP101830. doi: 10.7554/eLife.101830 (PMC12226018; doi:10.7554/eLife.101830)
Supplement: Figure 6—source data 1. [file elife-101830-fig6-data1.xlsx]

## Sheet: Fig6B
	Lesion area
	0 (µm)				150 (µm)				300 (µm)				450 (µm)				600 (µm)				Maximum lesion area
	Saline	Apoe-/- Treg	Ccr4-/-Apoe-/- Treg		Saline	Apoe-/- Treg	Ccr4-/-Apoe-/- Treg		Saline	Apoe-/- Treg	Ccr4-/-Apoe-/- Treg		Saline	Apoe-/- Treg	Ccr4-/-Apoe-/- Treg		Saline	Apoe-/- Treg	Ccr4-/-Apoe-/- Treg		Saline	Apoe-/- Treg	Ccr4-/-Apoe-/- Treg
	0.519921	0.608468	0.639322		1.33045	0.688976	1.71782		1.46419	0.642489	1.42095		1.05044	0.654158	1.61997		1.08396	1.23261	1.15613		1.46	1.23	1.72
	0.376649	0.588971	0		0.873423	1.07594	0.298981		0.836724	1.26974	0.364679		1.47057	0.827849	0.937436		0.863363	0.192933	0.253354		1.47	1.27	0.94
	0.695428	0.790225	0.738732		1.55621	1.7177	1.2657		1.83257	2.39483	1.59775		1.3415	1.7247	1.67846		1.18265	0.725006	0.689694		1.83	2.39	1.68
	0.176082	0.839606	2.21014		0.528884	1.70949	2.33863		0.976495	1.59384	2.80241		1.14253	1.59384	1.97591		0.998288	1.13857	1.51263		1.21	1.71	2.8
	0.463055	0.34149	0.156471		1.164	0.394454	0.296978		1.10788	0.496714	0.926811		0.828504	0.250604	1.36473		0.733853	0.029147	0.633241		1.16	0.5	1.36
	0.640564	0.792103	0.514273		0.741596	0.771072	0.851532		0.396777	0.809743	1.00787		0.403256	1.16709	1.11183		0.42976	0	1.2078		0.74	1.17	1.21
	0.300275	0.811416	1.05621		0.327936	0.855444	2.21205		0.497399	1.28462	3.26349		0.52555	1.38452	3.40445		0.341188	1.13948	1.44014		0.53	1.38	3.4
	0.295887	0.635218	1.09262		0.684716	1.21697	1.74572		0.994354	1.29955	2.15857		0.842521	0.758962	2.16168		0.503825	0.147577	1.98043		0.99	1.3	2.16
	0.478171	0.815875	0.768447		0.464589	1.75121	1.92435		0.671694	1.86401	1.96018		1.0658	1.7131	1.51577		1.01265	0.939746	0.764414		1.07	1.86	1.96
	0.389883	0.798514	0.471842		1.58566	1.62109	1.2499		1.72243	1.74732	1.47351		1.26025	0.444963	0.65462		0.430807	0.12411	0.334627		1.72	1.75	1.47
	0.276948	0.568892	0.60429		1.24673	0.75481	0.411389		1.94012	0.791143	0.319961		1.34642	1.18534	0.299825		0.521231	0.905761	0.100085		1.94	1.19	0.6
	0.787084	0.469381	0.529218		1.20764	1.02645	1.62834		1.22961	1.02367	0.784772		0.83279	0.972817	0.228101		0.407898	0.788659	0.035519		1.23	1.03	1.63
	0.473883	0.16755	0.267508		0.926148	0.650304	0.717744		1.24019	1.35241	1.2518		0.498353	1.19073	1.17606		1.02219	0.885857	0.990943		1.24	1.35	1.25
	0.474241	0.704353	0.491974		0.829942	1.33811	1.15682		0.213397	1.20866	0.972736		0.515362	0.568187	0.694124		0.835525	0.579943	0.282901		0.84	1.34	1.16
	0.61038	0.473883	0.320431		0.672201	0.926148	1.26293		0.560557	1.24019	2.38645		0.70111	0.498353	2.24231		0.35127	1.02219	1.25517		0.7	1.24	2.39
	1.58008	0.474241	0.498326		2.27848	0.829942	0.824492		2.57968	0.213397	1.25464		2.16835	0.515362	1.26198		1.20328	0.835525	0.718245		2.58	0.84	1.26
	0.310431	0.61038	0.242333		1.50865	0.672201	1.15207		1.9339	0.560557	2.82432		1.2257	0.70111	3.21652		0.789088	0.35127	3.12112		1.93	0.7	3.22
	0.206281		0.739609		1.4216		1.72633		2.23857		2.89434		1.96013		2.68512		1.31594		1.52684		2.24		2.89
			0.031662				0.730268				1.15347				1.15273				0.550825				1.15
			0.382919				0.890066				2.08193				2.1709				0.949527				2.17

## Sheet: Fig6C
	Macrophage area
	Saline	Apoe-/- Treg	Ccr4-/-Apoe-/- Treg
	33.5059	26.407	34.46
	44.9857	25.1603	32.8102
	30.7451	26.0443	33.778
	31.2347	35.3915	39.1483
	42.1128	30.4851	36.9582
	42.2213	26.4753	27.308
	31.0571	31.3757	32.2023
	34.237	28.8877	43.6122
	34.9708	24.1559	35.0159
	36.1062	29.8528	30.5065

## Sheet: Fig6D
	CD4 T cells/mm2
	Saline	Apoe-/- Treg	Ccr4-/-Apoe-/- Treg
	49.1891	41.3189	75.1279
	51.698	51.1184	44.7797
	52.6429	43.6984	50.0228
	63.6392	41.935	40.7919
	83.4204	41.9118	42.3946
	66.0899	49.9075	65.3981
	60.5681	54.2665	54.2379
	56.5296	58.8284	86.7055
	88.1713	47.7314	65.3438
	59.3777	33.0473	54.2466

## Sheet: Fig6E
	Collagen area
	Saline	Apoe-/- Treg	Ccr4-/-Apoe-/- Treg
	29.3964	27.3539	32.391
	31.155	34.1085	24.9943
	24.3534	35.6007	32.7212
	25.9556	31.1503	25.7017
	30.0121	44.1822	31.7152
	31.0765	39.0964	31.1907
	27.3448	23.1321	28.4479
	26.4656	33.5193	33.2246
	29.4058	29.7277	24.5781
	26.6984	36.5573	28.7545
